# Supplementary material for: Flexible transparent film heaters using a ternary composite of silver nanowire, conducting polymer, and conductive oxide
Source: Royal Society of Chemistry journal article supplement (doi:10.1039/c9ra00341j), 2019-01-01
Supplement: c9ra00341j2.pdf [file c9ra00341j2.pdf]

Electronic Supplementary Information for

## **Flexible Transparent Film Heaters Using Ternary Composite of Silver Nanowire, Conducting Polymer, and Conductive Oxide**

Juhyung Park,<sup>a</sup> Dongjun Han,<sup>a</sup> Seunghwan Choi,<sup>b</sup> Yunkyung Kim<sup>b</sup> and Jeonghun Kwak<sup>\*a</sup>

<sup>a</sup>*School of Electrical and Computer Engineering, University of Seoul, Seoul 02504, South Korea.*

<sup>b</sup>*Department of Electronics Engineering, Dong-A University, Busan 49315, South Korea.*

\*Corresponding Author: [jkwak82@uos.ac.kr](mailto:jkwak82@uos.ac.kr) (J. Kwak)

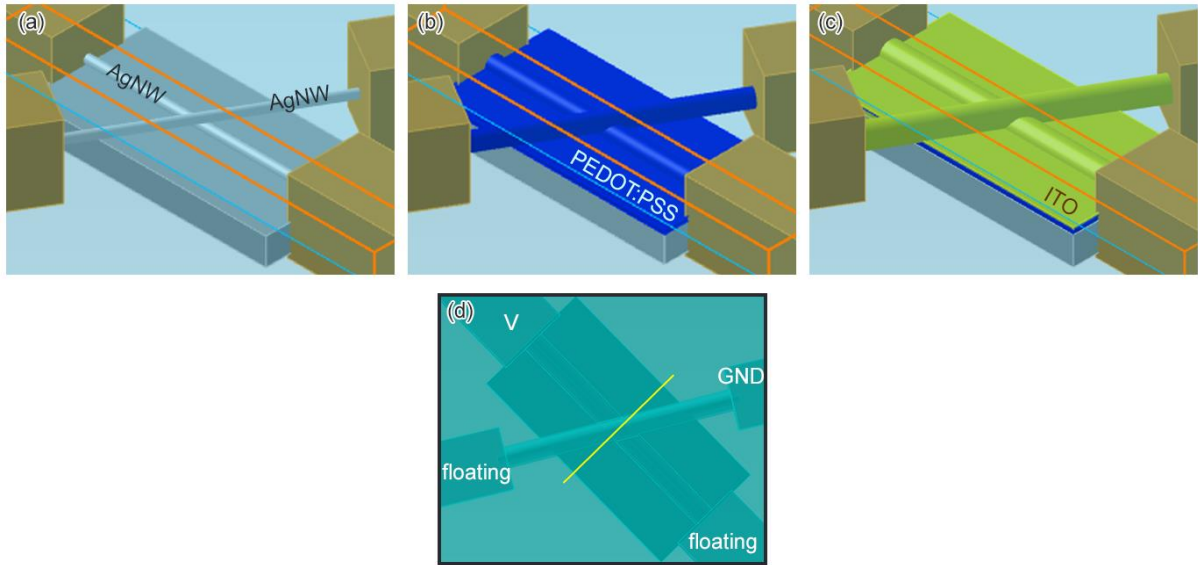

**Fig. S1.** Device simulation configuration in Lumerical DEVICE for (a) AgNW, (b) AgNW–PEDOT:PSS, and (c) AgNW–PEDOT:PSS/ITO. The length of each AgNW was set to 1  $\mu\text{m}$ . (d) Yellow line shows the cross-section position for the heat distribution displayed in Fig. 4 in the main text. To make the current flow from the V electrode to GND electrode in the figure, the remaining electrodes were set to floating electrodes.

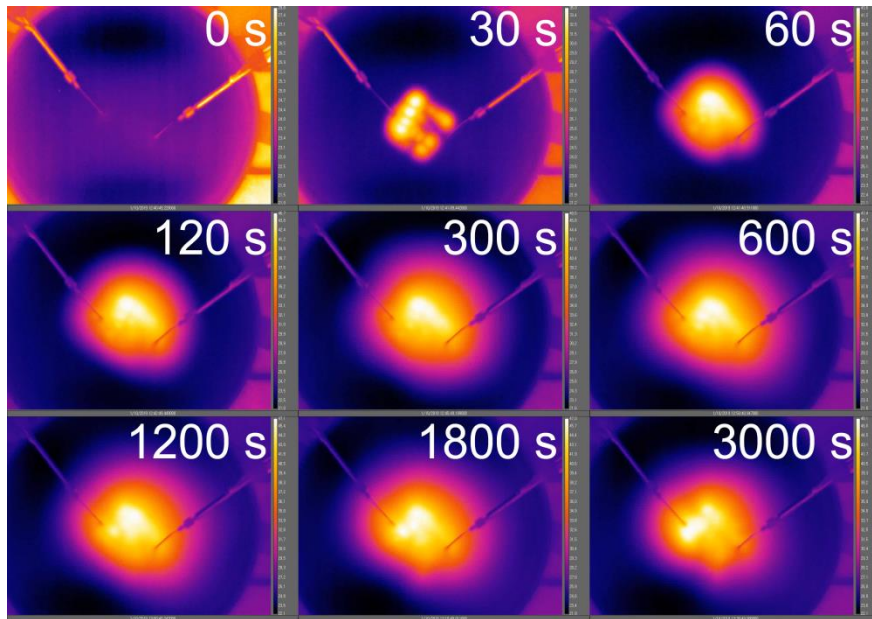

**Fig. S2.** Operation of the flexible thin film heaters (TFHs) based on the AgNW–PEDOT:PSS/ITO composite film in water over time.
